# Supplementary material for: Impact of cancer rehabilitation on the prognosis of patients with hepatocellular carcinoma
Source: PubMed Central journal article supplement — Oncol Lett. 2020 Jan 24;19(3):2355–67. doi: 10.3892/ol.2020.11345 (PMC7039060; doi:10.3892/ol.2020.11345), 2020-01-24

Figure S1. Difference in  $\Delta$ SMI between etiological difference of (A) liver disease, (B) sex and (C) Child-Pugh class in the CR group. (A) There was no significant difference in  $\Delta$ SMI among the multiple etiologies of liver disease. CR, cancer rehabilitation; AIH, autoimmune hepatitis; HBV, hepatitis B virus; HCV, hepatitis C virus; NASH, non-alcohol steatohepatitis; N.S., not significant; SMI, skeletal muscle index.

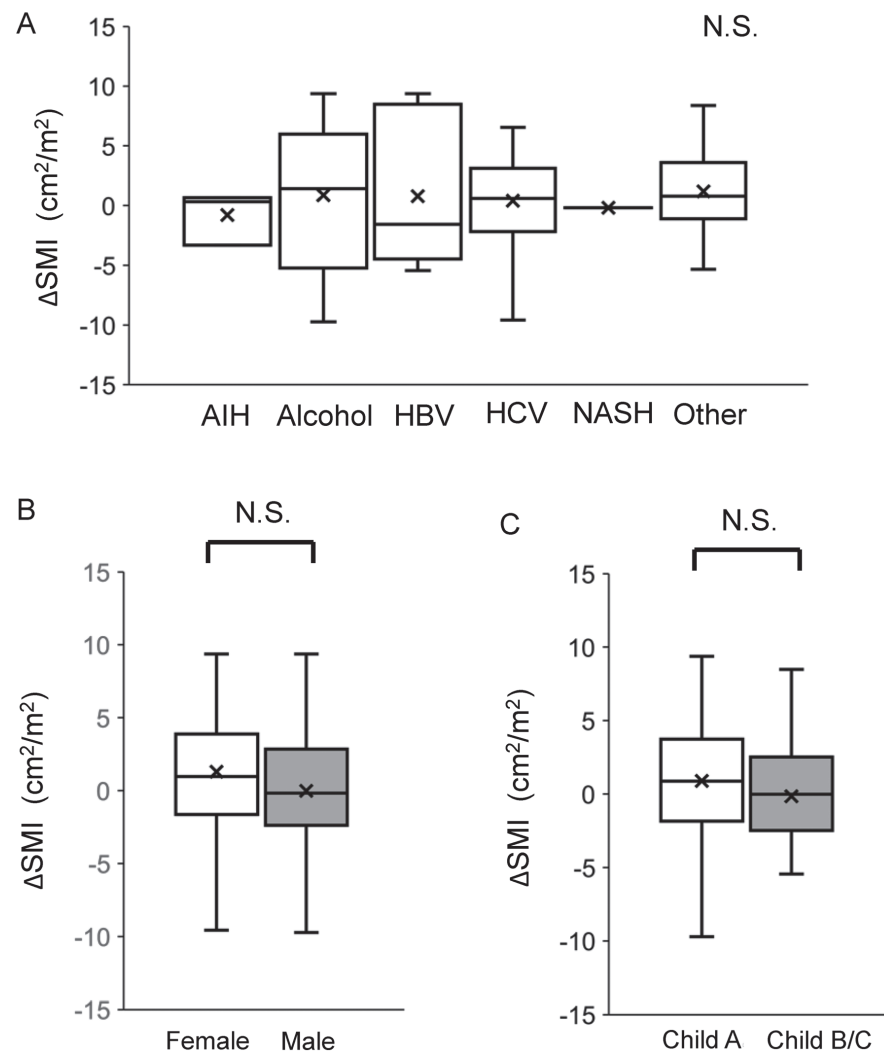

Figure S2. (A) Difference in survival rate between the groups with increased and decreased SMI in the CR group. (B) Difference in survival rate between the groups with increased and decreased of SMI in the control group. CR, cancer rehabilitation; SMI, skeletal muscle index.

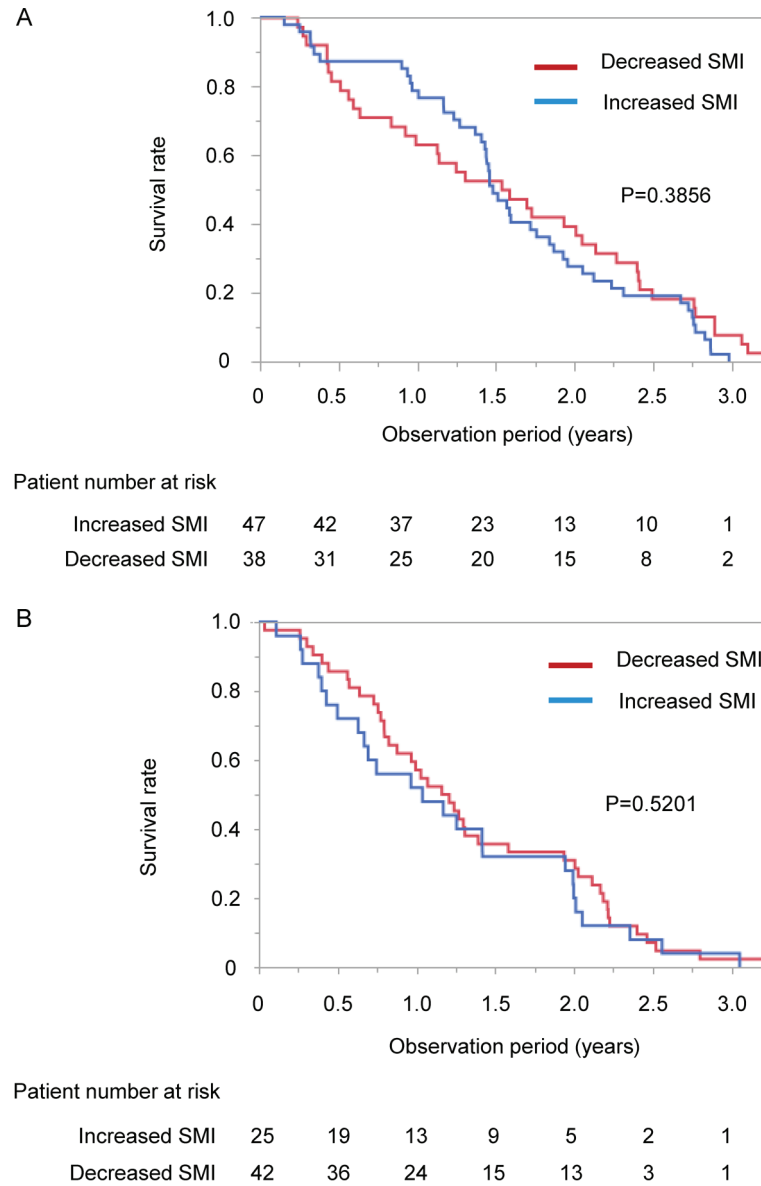

Supplement: Supplementary_Data.pdf [file Supplementary_Data.pdf]
